# Supplementary material for: Altered hippocampal transcriptome dynamics following sleep deprivation
Source: PubMed Central journal article supplement (PMC8361790; doi:10.1186/s13041-021-00835-1), 2021-08-12
Supplement: 13041_2021_835_MOESM1_ESM.pdf [file 13041_2021_835_MOESM1_ESM.pdf]

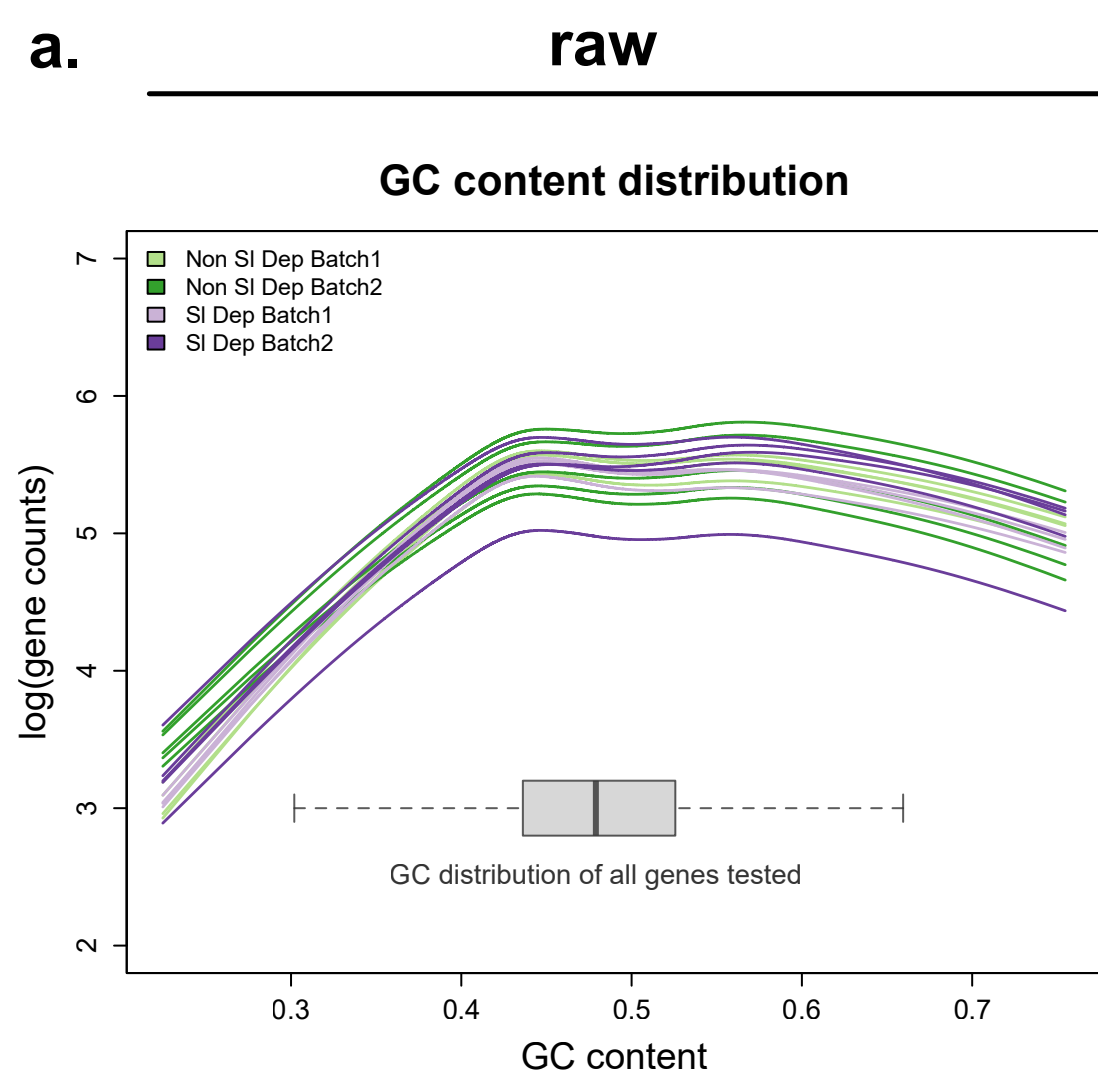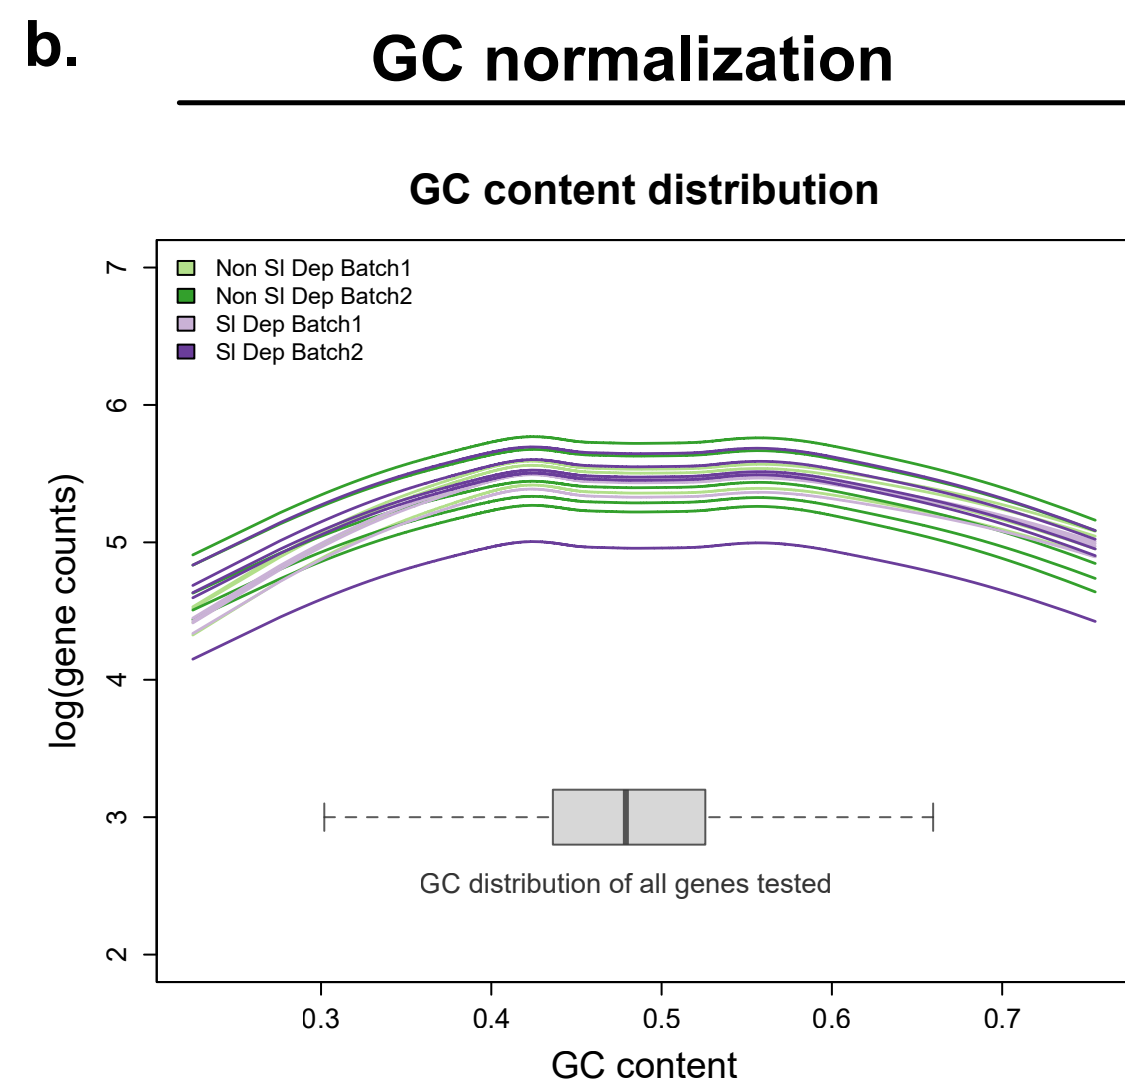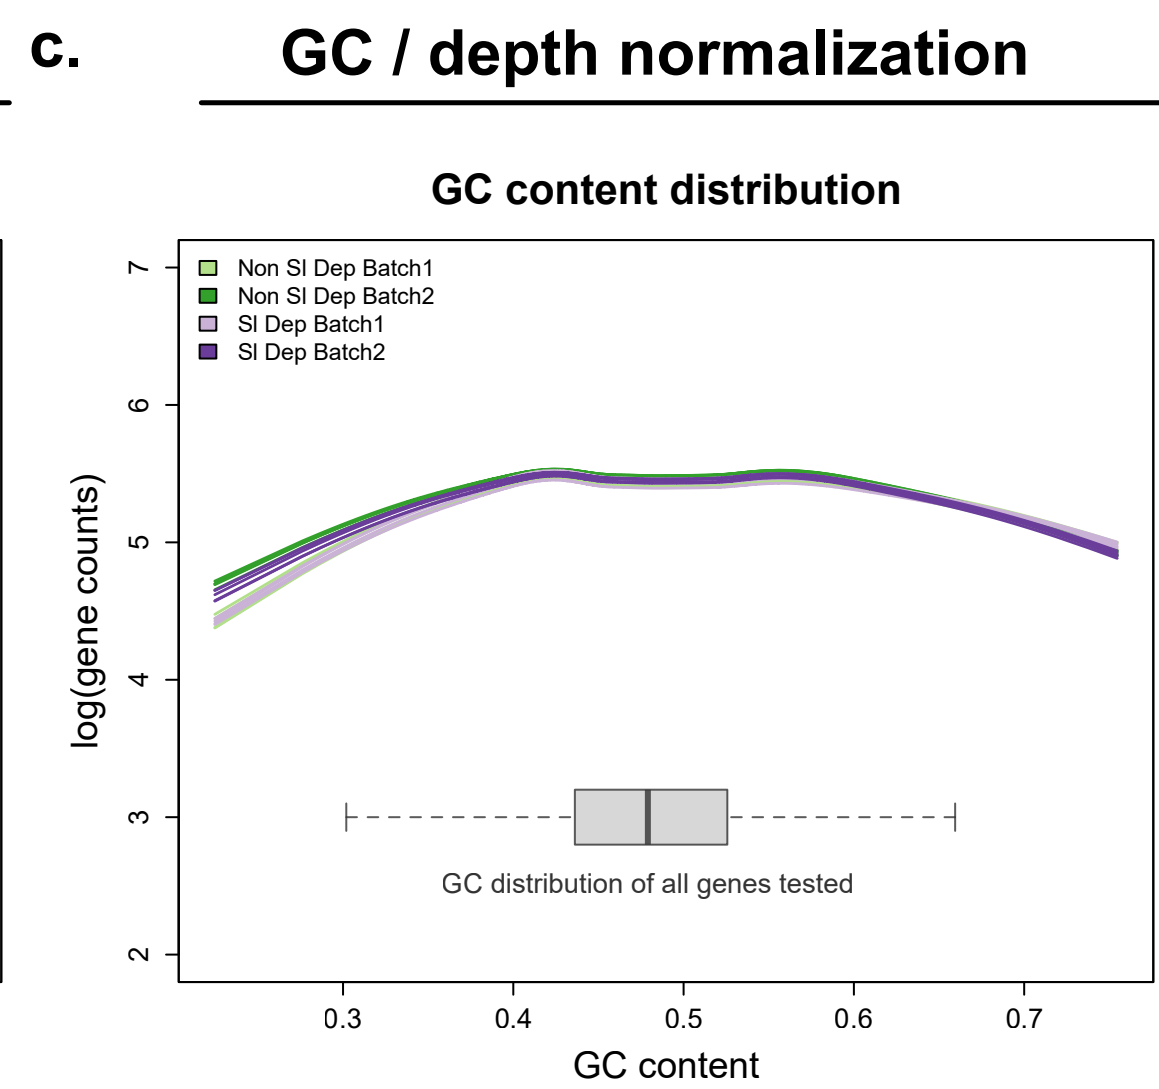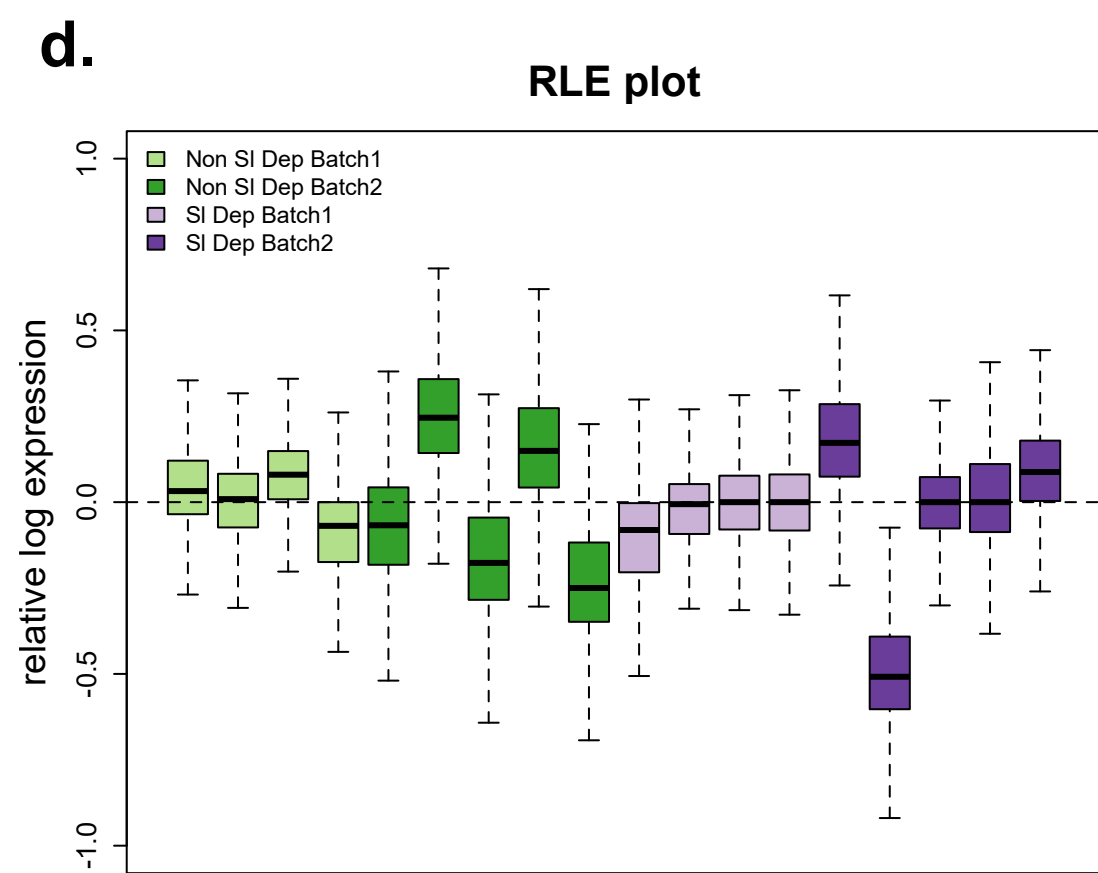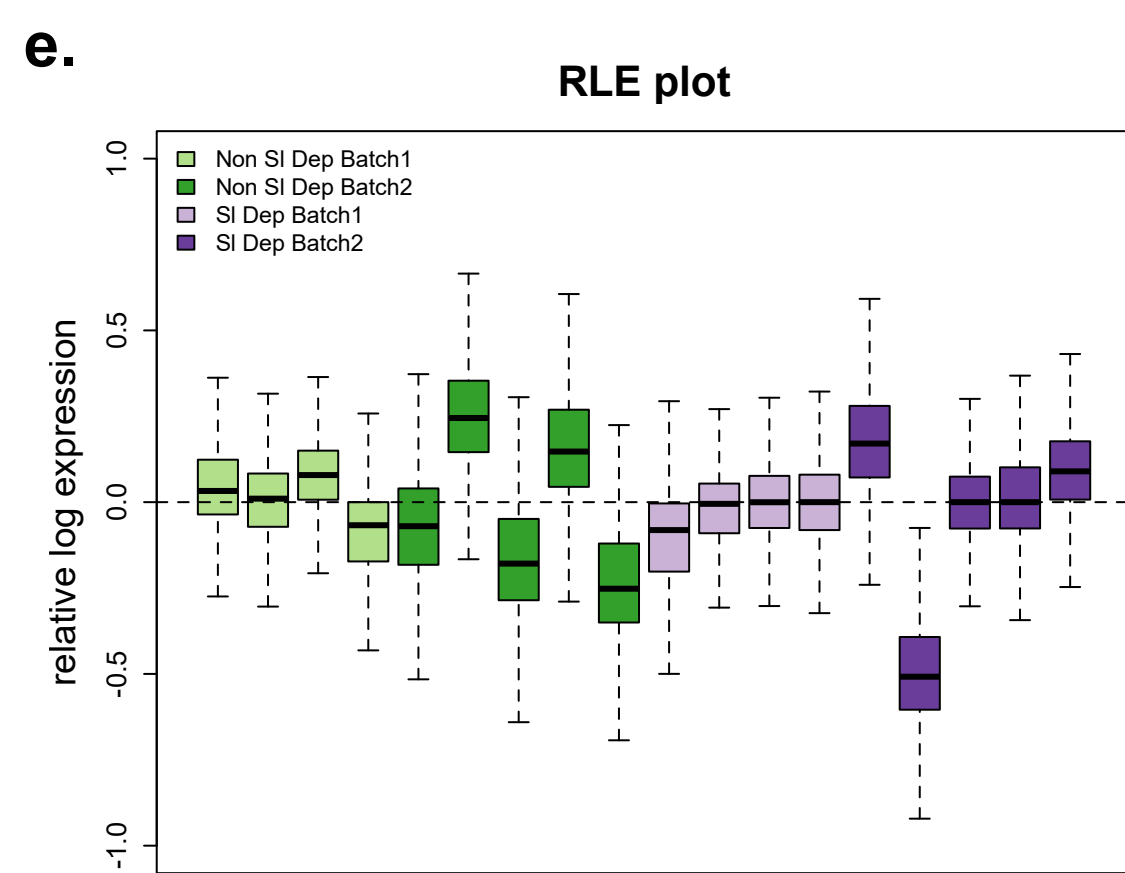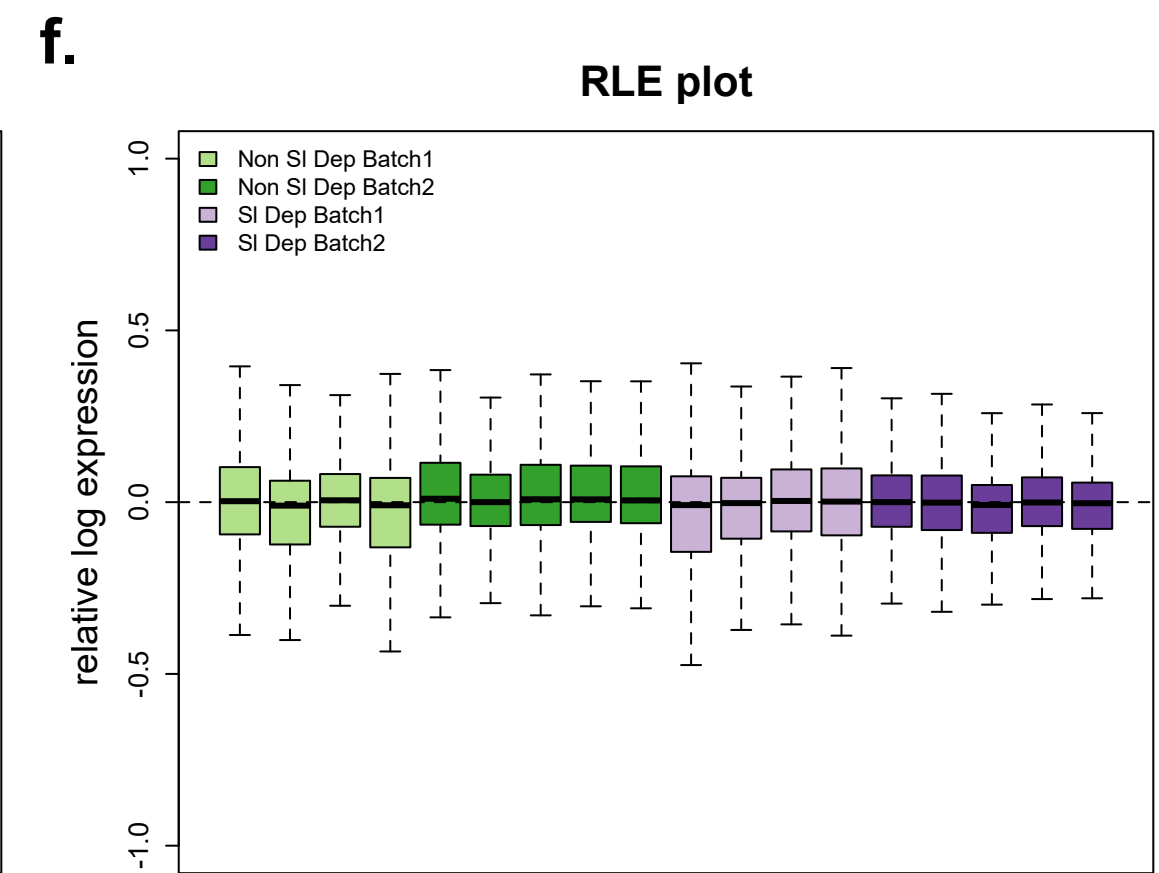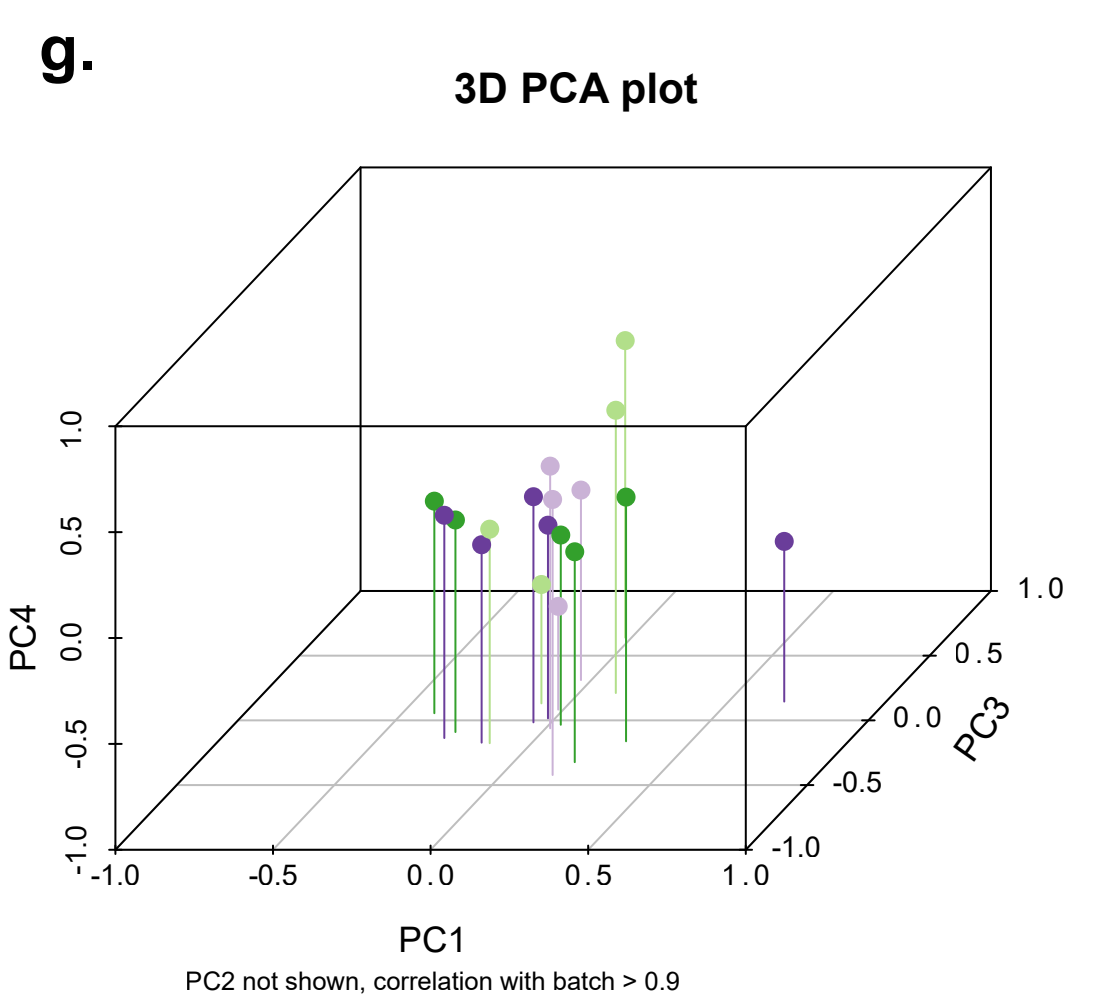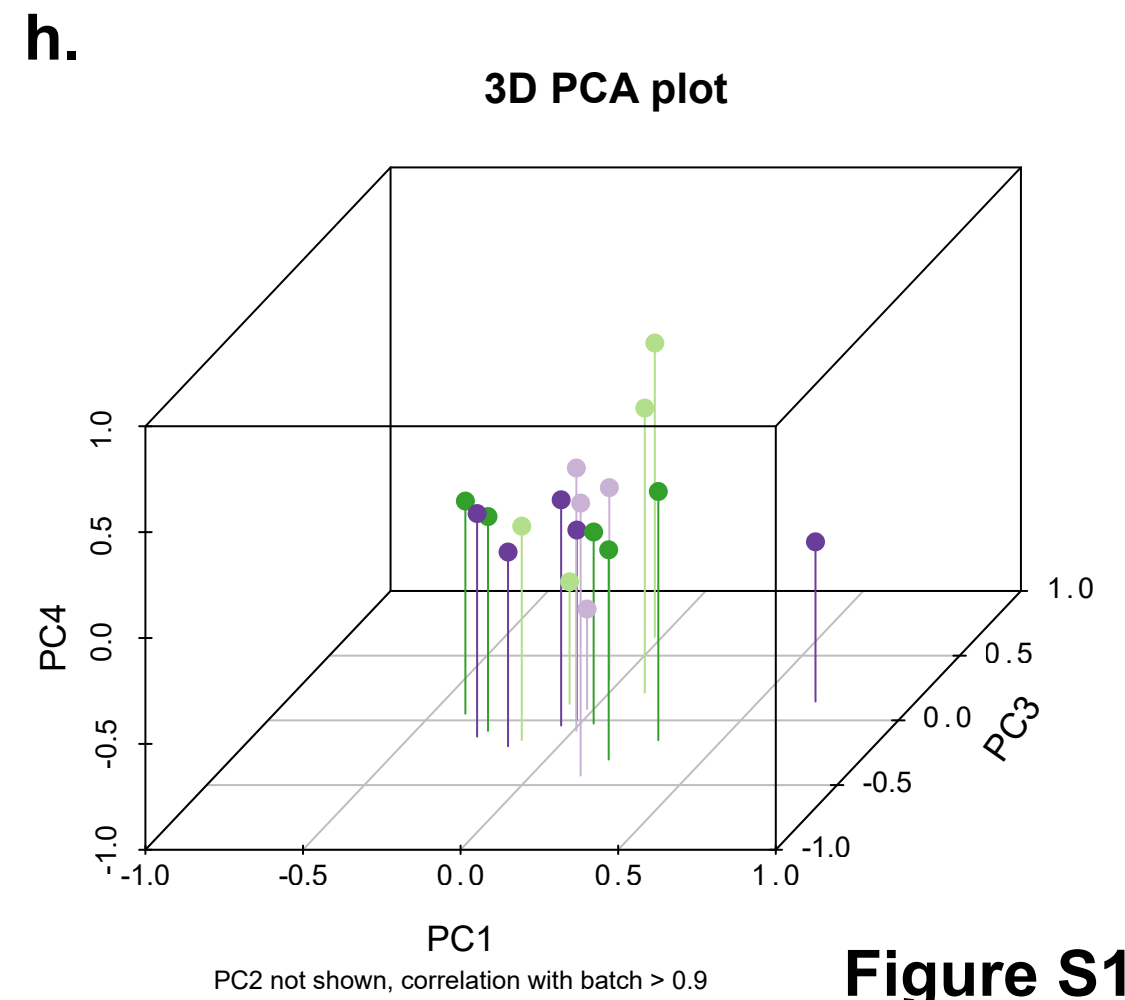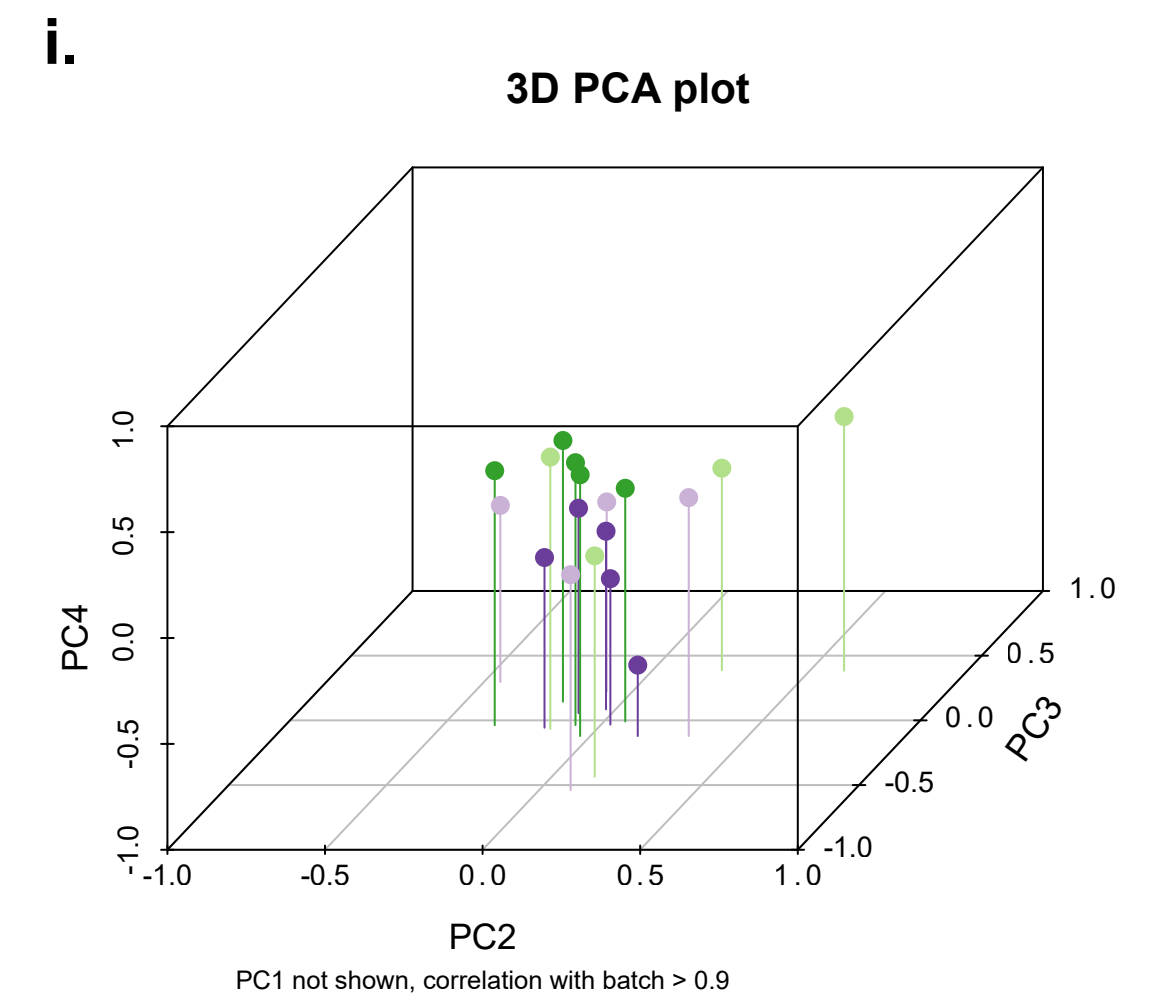

**Figure S1**

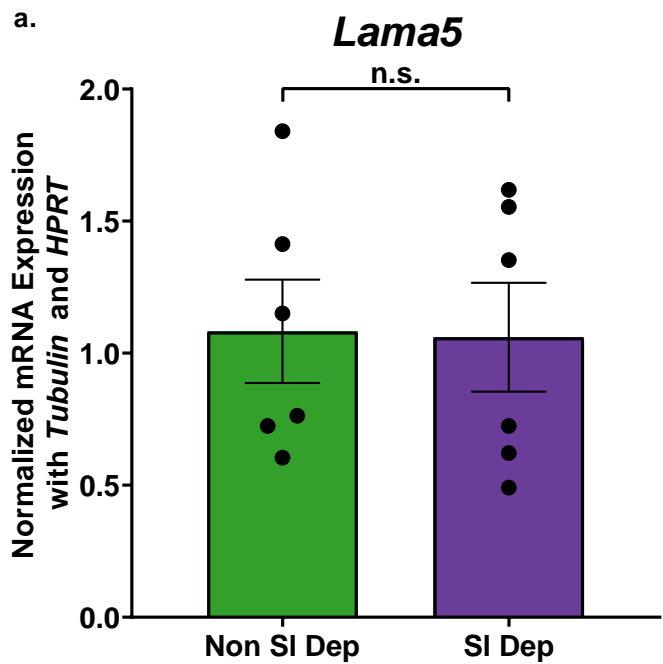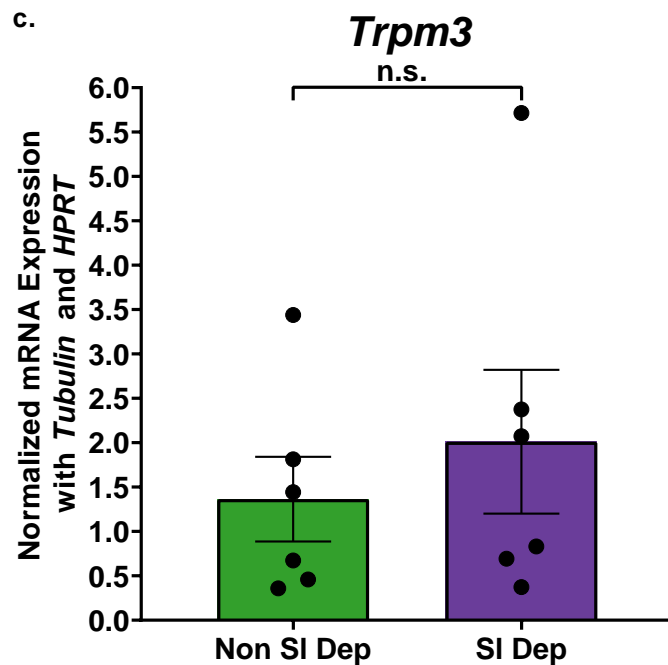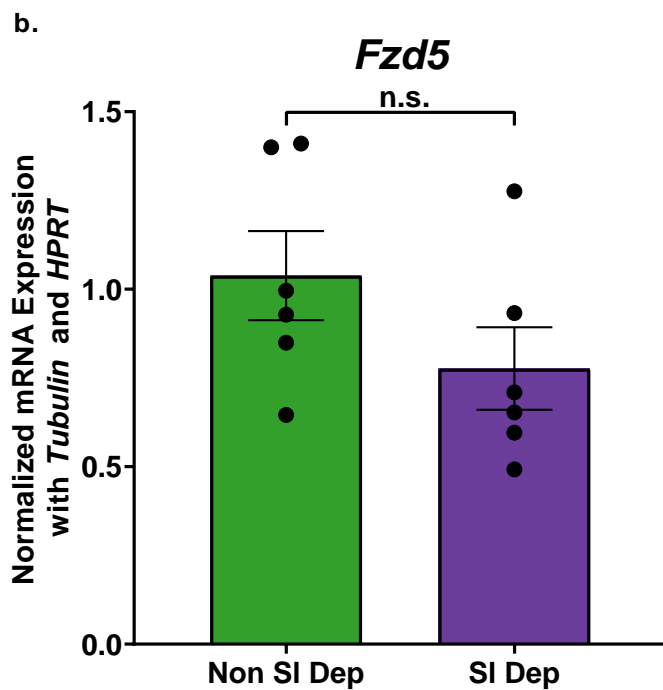

Figure S2
